# Supplementary material for: Theoretical investigations of sp-sp2 hybridized zero-dimensional fullerenynes
Source: Royal Society of Chemistry journal article supplement (doi:10.1039/c2nr30299c), 2012-01-01
Supplement: c2nr30299c.pdf [file c2nr30299c.pdf]

**[Supporting Information]**

**Theoretical investigations of  $sp$ - $sp^2$  hybridized  
zero-dimensional fullerenynes**

Shengli Zhang,<sup>†</sup> Yonghong Zhang,<sup>‡</sup> Shiping Huang,<sup>\*,†</sup> and Chunru Wang<sup>§</sup>

<sup>†</sup>Division of Molecule and Materials Simulation, State Key Laboratory of Organic-Inorganic Composites, Beijing University of Chemical Technology, Beijing 100029, China

<sup>‡</sup>Dept. of Physics, Tianjin Polytechnic University, Tianjin 300160, China

<sup>§</sup>Beijing National Laboratory for Molecular Sciences (BNLMS), Key Lab of Molecular Nanostructure and Nanotechnology, Institute of Chemistry, Chinese Academy of Sciences, Beijing 100190, China

---

\*To whom correspondence should be addressed. Fax: +86-10-64427616. E-mail address: [huangsp@mail.buct.edu.cn](mailto:huangsp@mail.buct.edu.cn)

## Methods

First-principles DFT calculations were performed within the generalized-gradient approximation (GGA) implemented in the DMol3 software. The Perdew, Burke, and Ernzerhof (PBE) exchange–correlation functional is used. All fullerenyne nanostructures are optimized without any symmetry constraints. Double numerical basis sets including polarization functions on all atoms (DNP) are used in the calculations.<sup>1,2</sup> The DNP basis set corresponds to a double- $\zeta$  quality basis set with a p-type polarization function added to hydrogen and d-type polarization functions added to heavier atoms. The global cutoff radius is set to be 3.7 Å. The convergence criteria applied during geometry optimization is  $1.0 \times 10^{-6}$  Hartree for energy. All atoms are relaxed until the force on each atom is less than 0.002 Ha/Å. Smearing of 0.0001 Ha is used for these systems to accelerate SCF convergence. For corroborating the stable structures, the vibrational frequency calculations have been performed, which further verify the true minima of the potential energy surface of all nanostructures. In addition, the binding energy per atom is calculated in order to analyze the relative stability of clusters with different structures.<sup>3</sup> We have defined the average binding energy ( $E_b$ ) as the energy gained in assembling the fullerenyne nanocages from its isolated constituent atoms. Hence, the binding energies of fullerenynes are calculated by Equation:

$$E_b = (nE_C - E_{system})/n,$$

where  $E_C$  is the sum of the energies of individual carbon atoms;  $E_t$  is the total energy of the system.

The molecular dynamics simulation (MD), with the simulation package GULP, was performed for C<sub>96</sub> fullerene based on ReaxFF force field at temperatures 298K and 300-1100 K. All simulations were performed under constant temperature and constant volume (NVT) conditions. The semiclassical reactive force field (ReaxFF) method by van Duin and co-workers<sup>4</sup> is apparently computationally much more economical and enables the simulation on a nanosecond time scale. ReaxFF energetics of  $\pi$ -conjugated species are generally in good agreement with quantum chemical DFT benchmark data by virtue of the empirical parametrization.<sup>5</sup> C<sub>96</sub> fullerene was allowed to equilibrate for 4000 ps with a time step of 1 fs. We simulated the C<sub>96</sub> fullerene at 100 K intervals from 300 K to 1100 K. In addition, we calculated the production stage of MD simulation for 5000 ps in this study.

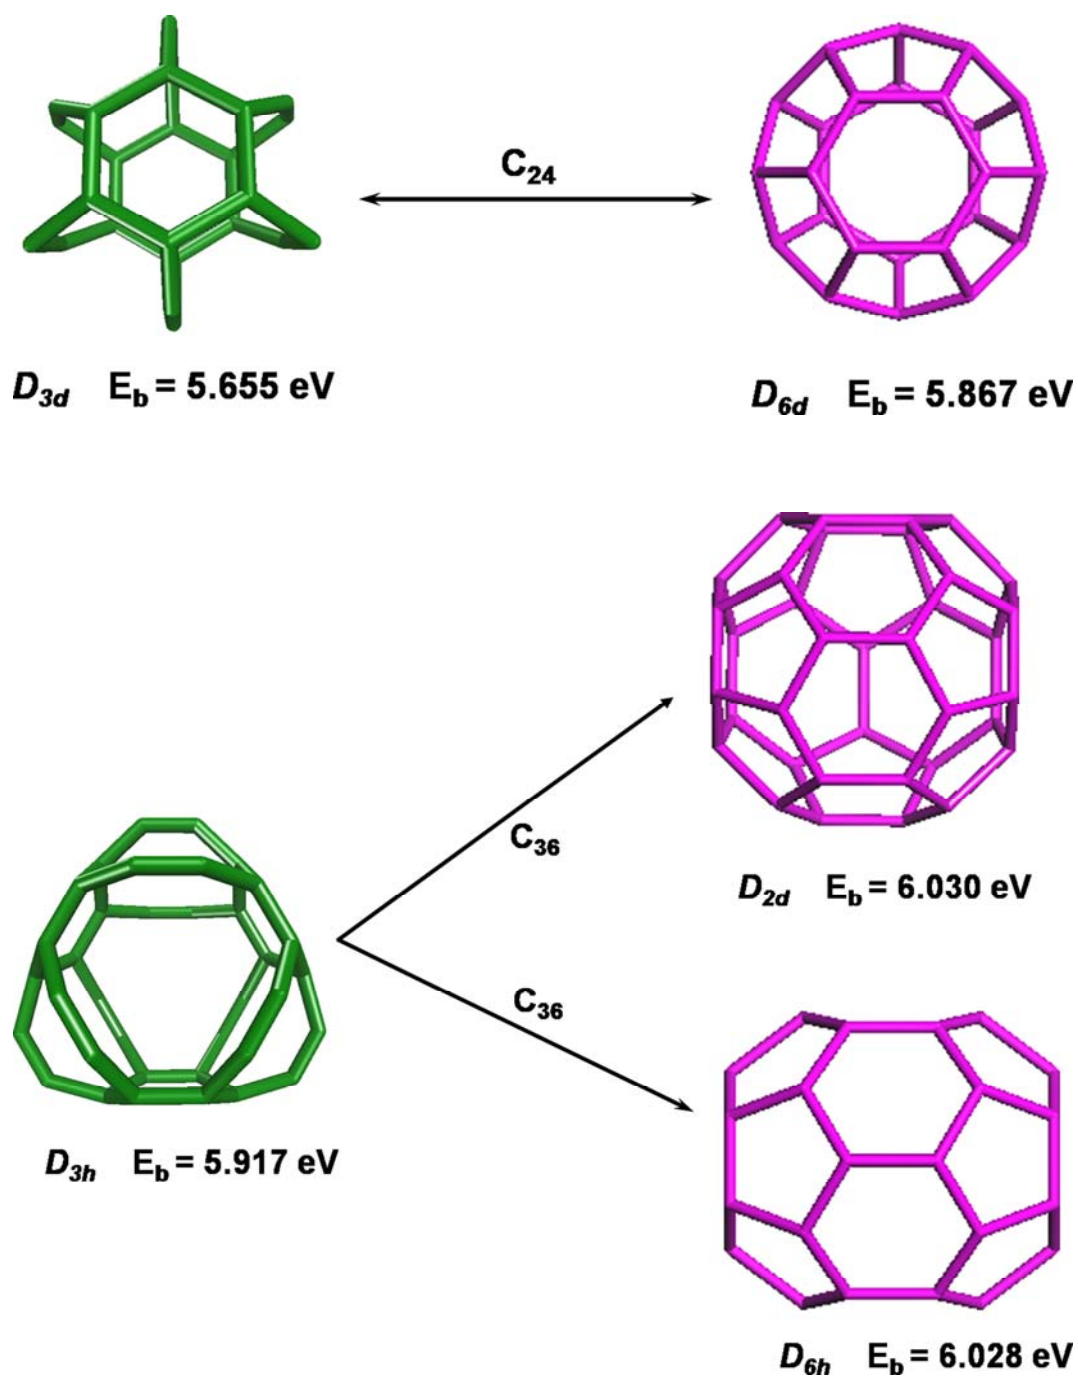

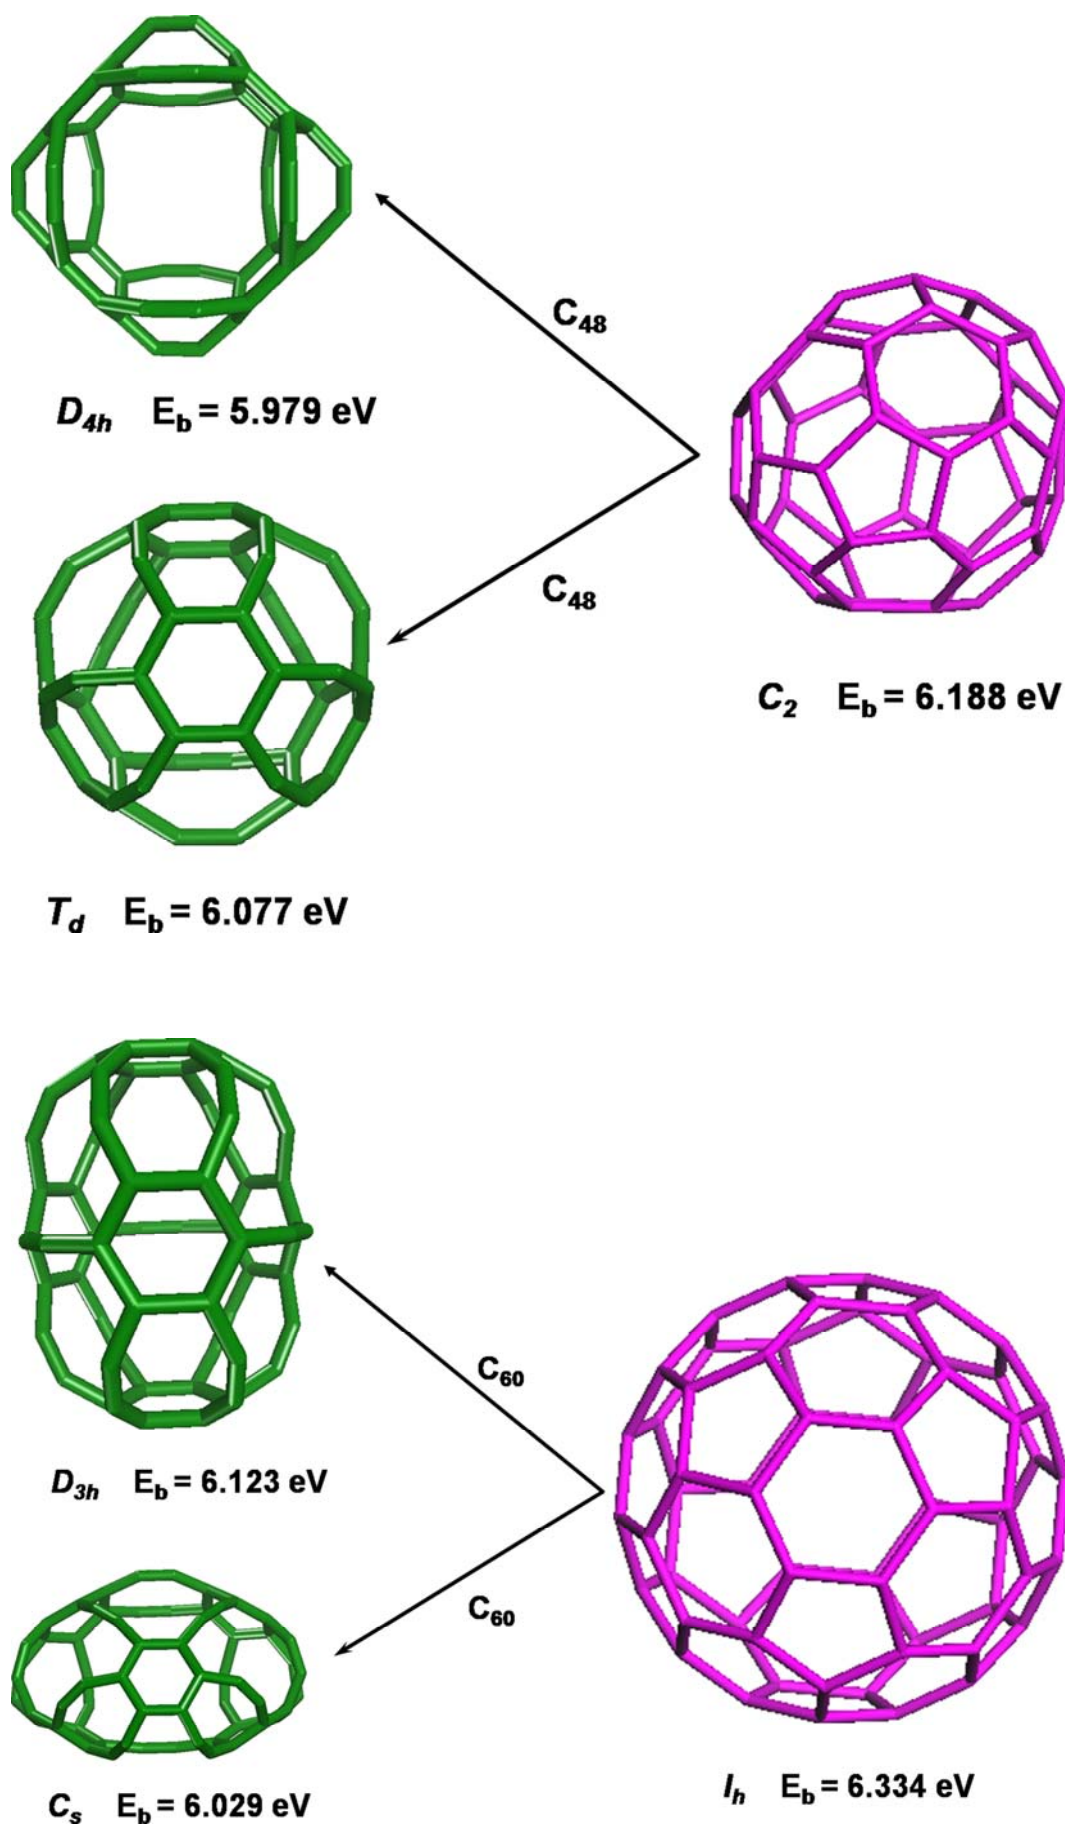

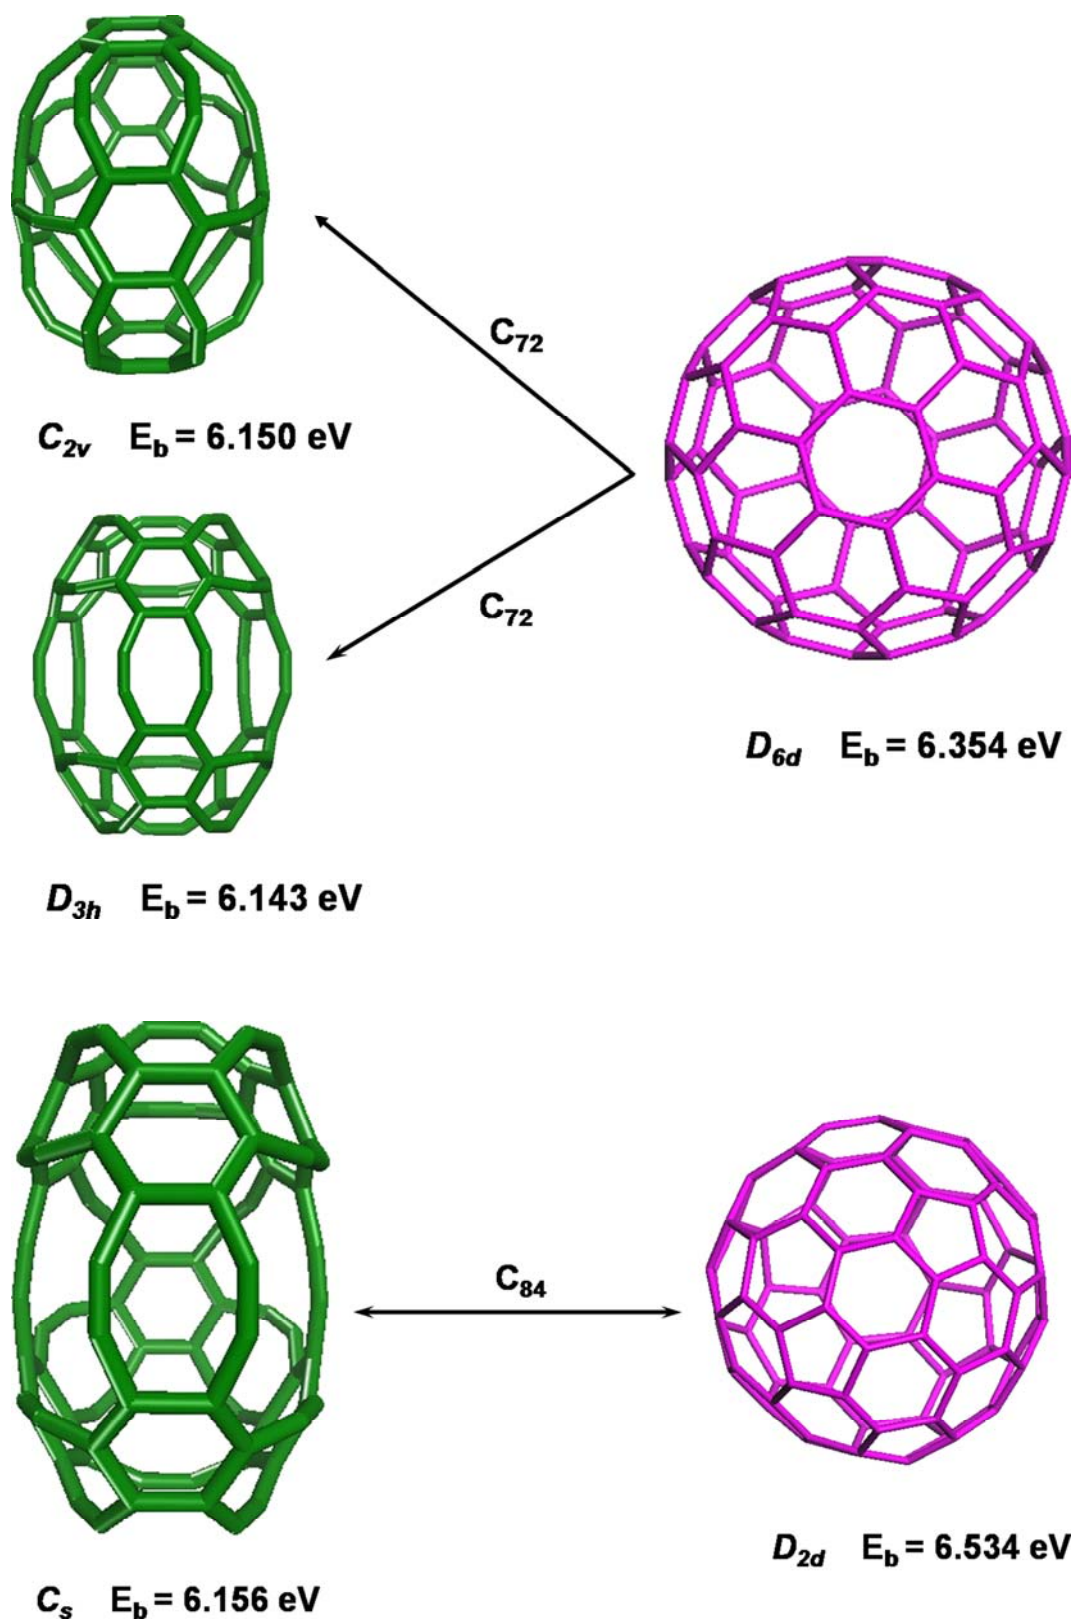

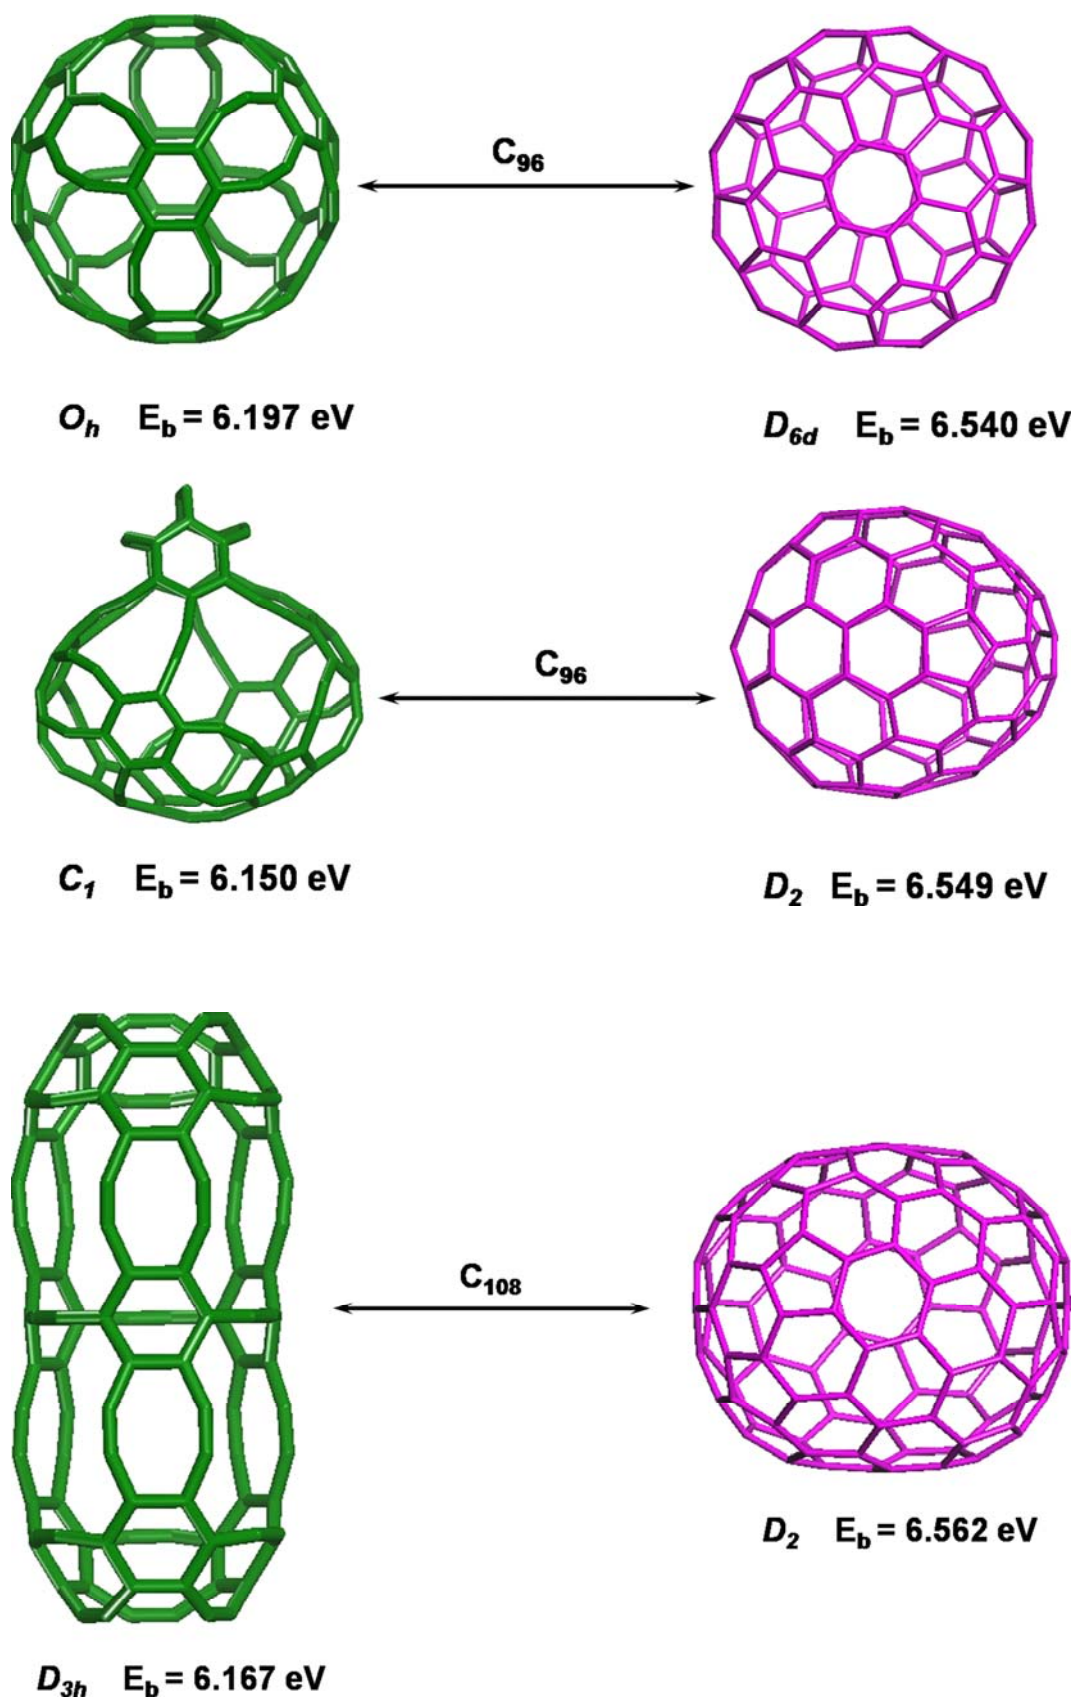

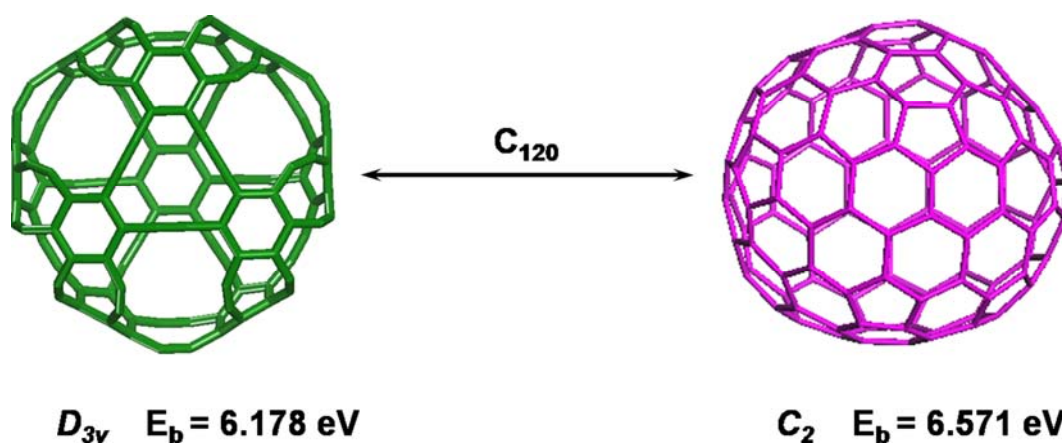

**Fig. S1** All  $sp$ - $sp^2$  hybridized fullerene models from  $C_{24}$  to  $C_{120}$  with different symmetry groups and binding energies, and the corresponding closest (in molecular weight) non- $sp$ - $sp^2$  hybridized fullerene structures. The green carbon models and pink carbon models present fullerene and fullerene, respectively. Herein, the corresponding closest non- $sp$ - $sp^2$  hybridized fullerene structures are very stable from the available reports<sup>6,7</sup>.

- 1 J. P. Perdew, K. Burke and M. Ernzerhof, *Phys. Rev. Lett.*, 1996, **77**, 3865.
- 2 B. Delley, *J. Phys. Chem.*, 1996, **100**, 6104.
- 3 S. L. Zhang, Y. H. Zhang, S. P. Huang, H. Liu and H. P. Tian, *Chem. Phys. Lett.*, 2010, **498**, 172.
- 4 A. C. T. van Duin, S. Dasgupta, F. Lorant and W. A. Goddard, *J. Phys. Chem. A*, 2001, **105**, 9396.
- 5 K. D. Nielson, A. C. T. van Duin, J. Oxgaard, W.Q. Deng and W. A. Goddard III, *J. Phys. Chem. A*, 2005, **109**, 493.
- 6 N. Shao, Y. Gao, S. Yoo, W. An and X. C. Zheng, *J. Phys. Chem. A*, 2006, **110**, 7672.



7 N. Shao, Y. Gao and X. C. Zheng, *J. Phys. Chem. C*, 2007, **111**, 17671.

**Table S1.** All the fullerenynes ( $C_n$ ) with the corresponding symmetry groups and energy gaps (eV).

| $C_n$     | Symmetry group | Energy gap (eV) |
|-----------|----------------|-----------------|
| $C_{24}$  | $D_{3d}$       | 1.44            |
| $C_{36}$  | $D_{3h}$       | 0.52            |
| $C_{48}$  | $D_{4h}$       | 0.55            |
| $C_{48}$  | $T_d$          | 1.30            |
| $C_{60}$  | $D_{3h}$       | 1.30            |
| $C_{60}$  | $C_s$          | 0.48            |
| $C_{72}$  | $C_{2v}$       | 0.52            |
| $C_{72}$  | $D_{3h}$       | 0.85            |
| $C_{84}$  | $C_s$          | 0.76            |
| $C_{96}$  | $O_h$          | 0.74            |
| $C_{96}$  | $C_1$          | 0.51            |
| $C_{108}$ | $D_{3h}$       | 0.50            |
| $C_{120}$ | $C_{3v}$       | 0.50            |

The xyz coordinate of C<sub>96</sub> fullerenyne with *O<sub>h</sub>* symmetry group is presented.

96

C<sub>96</sub> *O<sub>h</sub>* symmetry

|   |               |              |              |
|---|---------------|--------------|--------------|
| C | -15.060636088 | 17.012519404 | 13.898834175 |
| C | -16.910977158 | 15.159458108 | 13.735916054 |
| C | -16.257024318 | 15.218795828 | 14.993930871 |
| C | -16.885336736 | 12.902482620 | 15.592722534 |
| C | -15.225681830 | 16.250529231 | 15.084824431 |
| C | -14.221322835 | 16.154253664 | 16.060159889 |
| C | -16.244497445 | 14.134348204 | 15.885266157 |
| C | -15.198853354 | 14.037117219 | 16.902201426 |
| C | -12.972603450 | 16.814766894 | 15.929229280 |
| C | -14.208830631 | 15.027815269 | 16.989599727 |
| C | -12.951350389 | 14.792571201 | 17.602123749 |
| C | -15.016558985 | 12.732050222 | 17.425864901 |
| C | -11.743260163 | 16.816826615 | 15.924795007 |
| C | -11.722041929 | 14.794811313 | 17.594906480 |
| C | -10.474780042 | 15.039071155 | 16.963730601 |
| C | -9.647954008  | 12.748039387 | 17.383904669 |
| C | -10.487952245 | 16.164771135 | 16.033075991 |
| C | -9.502735071  | 16.267968682 | 15.039683342 |

|   |               |              |              |
|---|---------------|--------------|--------------|
| C | -9.480393822  | 14.054525039 | 16.858402561 |
| C | -8.456386629  | 14.158160544 | 15.820266617 |
| C | -9.693252834  | 17.028632256 | 13.856535397 |
| C | -8.466147467  | 15.243229694 | 14.929692335 |
| C | -7.832280046  | 15.188187674 | 13.661902413 |
| C | -7.813082748  | 12.930649760 | 15.515569793 |
| C | -16.886179962 | 11.677394716 | 15.481161980 |
| C | -16.899706080 | 9.816613510  | 13.228222804 |
| C | -16.246807548 | 9.521264351  | 14.453066542 |
| C | -15.039720308 | 7.978295735  | 13.034023094 |
| C | -16.239694874 | 10.415312001 | 15.535507052 |
| C | -15.194301971 | 10.320658439 | 16.552134909 |
| C | -15.207934359 | 8.498881861  | 14.342535139 |
| C | -14.205179080 | 8.407789569  | 15.320220368 |
| C | -15.012266774 | 11.507462409 | 17.309030964 |
| C | -14.197431084 | 9.339216540  | 16.444901554 |
| C | -12.940757346 | 9.464119887  | 17.090600000 |
| C | -12.952854958 | 7.789956525  | 15.069522661 |
| C | -9.647018873  | 11.523290486 | 17.268228238 |
| C | -11.711455258 | 9.465351586  | 17.084334811 |
| C | -10.464045600 | 9.348775447  | 16.418310192 |
| C | -11.723470442 | 7.792983105  | 15.063476265 |

|   |               |              |              |
|---|---------------|--------------|--------------|
| C | -9.471975470  | 10.337050038 | 16.508228477 |
| C | -8.448137780  | 10.440091964 | 15.470377295 |
| C | -10.470396155 | 8.417321500  | 15.293046687 |
| C | -9.485745560  | 8.514701905  | 14.297977125 |
| C | -7.810480525  | 11.705480994 | 15.405042045 |
| C | -8.453470768  | 9.545520000  | 14.388715557 |
| C | -7.819773680  | 9.842878676  | 13.154441191 |
| C | -9.668867323  | 7.991646411  | 12.992247306 |
| C | -15.066113261 | 17.135093816 | 12.674792425 |
| C | -16.915466363 | 15.283304813 | 12.511993605 |
| C | -16.281646624 | 15.581296166 | 11.278017193 |
| C | -16.927090168 | 13.423126406 | 10.259835315 |
| C | -15.249179679 | 16.612002974 | 11.369200206 |
| C | -14.265421423 | 16.710664191 | 10.373343517 |
| C | -16.287836651 | 14.687762665 | 10.195533007 |
| C | -15.264059952 | 14.791098451 | 9.157671654  |
| C | -13.012430610 | 17.335506931 | 10.602238455 |
| C | -14.272116005 | 15.779589288 | 9.247754124  |
| C | -13.024745040 | 15.662617003 | 8.581737957  |
| C | -15.087555646 | 13.604834726 | 8.398133166  |
| C | -11.783122626 | 17.338049811 | 10.596407895 |
| C | -11.795393640 | 15.664434829 | 8.575265128  |

|   |               |              |              |
|---|---------------|--------------|--------------|
| C | -10.538643031 | 15.788862551 | 9.220916868  |
| C | -9.724103000  | 13.620545966 | 8.356507050  |
| C | -10.530809838 | 16.720180300 | 10.345742108 |
| C | -9.528710594  | 16.628082392 | 11.323940782 |
| C | -9.541833922  | 14.807439737 | 9.113350116  |
| C | -8.496202555  | 14.712831074 | 10.129739048 |
| C | -9.696602390  | 17.149065717 | 12.632223066 |
| C | -8.489614042  | 15.605896339 | 11.212989071 |
| C | -7.837104690  | 15.309150865 | 12.437729868 |
| C | -7.849196730  | 13.450959147 | 10.183790545 |
| C | -16.925042743 | 12.198085088 | 10.147873531 |
| C | -16.904319239 | 9.943324642  | 12.004542469 |
| C | -16.271029825 | 9.886581371  | 10.736555706 |
| C | -15.045058962 | 8.100222429  | 11.809868575 |
| C | -16.281342458 | 10.970434267 | 9.844439803  |
| C | -15.256938889 | 11.073811340 | 8.806968896  |
| C | -15.234301251 | 8.861938593  | 10.627262457 |
| C | -14.248928235 | 8.964463157  | 9.633843988  |
| C | -15.089919158 | 12.380230083 | 8.280953649  |
| C | -14.261983839 | 10.089652932 | 8.702668497  |
| C | -13.014245969 | 10.335720328 | 8.073016978  |
| C | -12.993293801 | 8.313394418  | 9.744043018  |

|   |               |              |              |
|---|---------------|--------------|--------------|
| C | -9.720161465  | 12.395920661 | 8.240544621  |
| C | -11.784890870 | 10.335000635 | 8.064777694  |
| C | -10.527268836 | 10.100035958 | 8.677473957  |
| C | -11.764083480 | 8.315560749  | 9.740461020  |
| C | -9.537226079  | 11.090959875 | 8.764227031  |
| C | -8.491277693  | 10.993976932 | 9.780518971  |
| C | -10.514822326 | 8.974744554  | 9.607519894  |
| C | -9.510286139  | 8.878885176  | 10.582845732 |
| C | -7.849863560  | 12.225879215 | 10.071777251 |
| C | -8.478661216  | 9.910178599  | 10.672899994 |
| C | -7.824844345  | 9.970567442  | 11.930944352 |
| C | -9.675279603  | 8.116608547  | 11.768436437 |
